# Supplementary material
Source: publisher figshare collection journal article supplement (https://tandf.figshare.com/articles/dataset/_/5631754)
Supplement: Supplementary file 1 [file 2]

Archive with 2 entries (2 files):
- tjps_a_1360950_sm6017.pdf
- tjps_a_1360950_sm8900.pdf
