# Supplementary material
Source: publisher figshare collection journal article supplement (https://tandf.figshare.com/articles/dataset/_/5631754)

## Supplementary Information

### Peatland substrates in northern KwaZulu-Natal: a study of the forming environments, properties and an approach towards classification

Marvin Gabriel, Camelia Toader, Franziska Faul, Niko Roßkopf, Piet-Louis Grundling, Cornelius Wilhelm van Huyssteen and Jutta Zeitz

South African Journal of Plant and Soil 2018, 35(2): 149–160. DOI: 10.1080/02571862.2017.1360950

**Figure S1:** Cross-section of site CVB (transect 3)

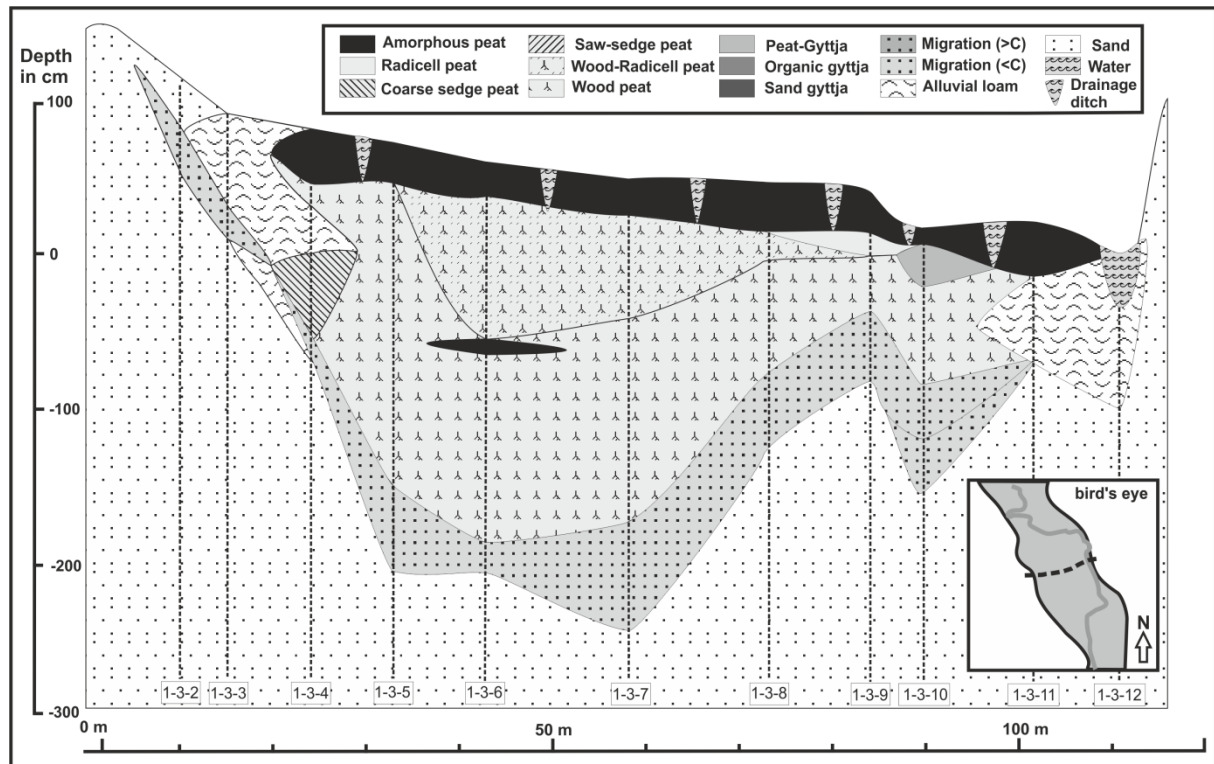

**Figure S2:** Cross-section of site ID1 (transect 2)

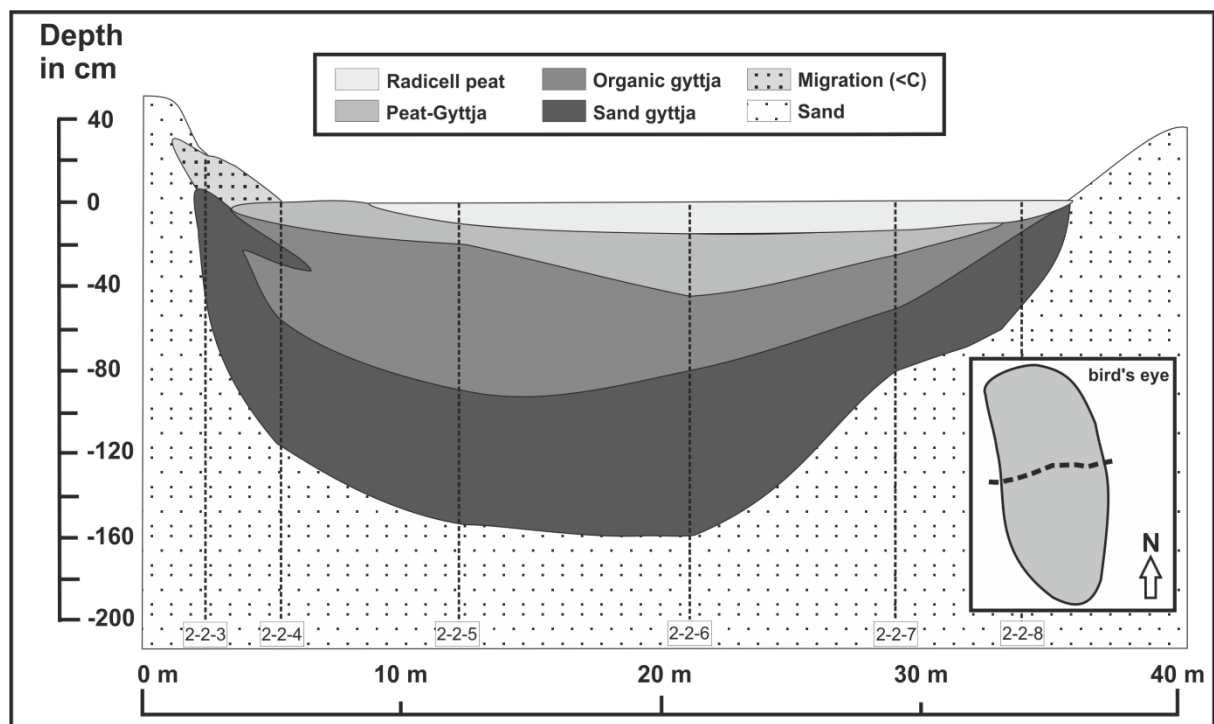

**Figure S3:** Cross-section of site ID2 (transect 1)

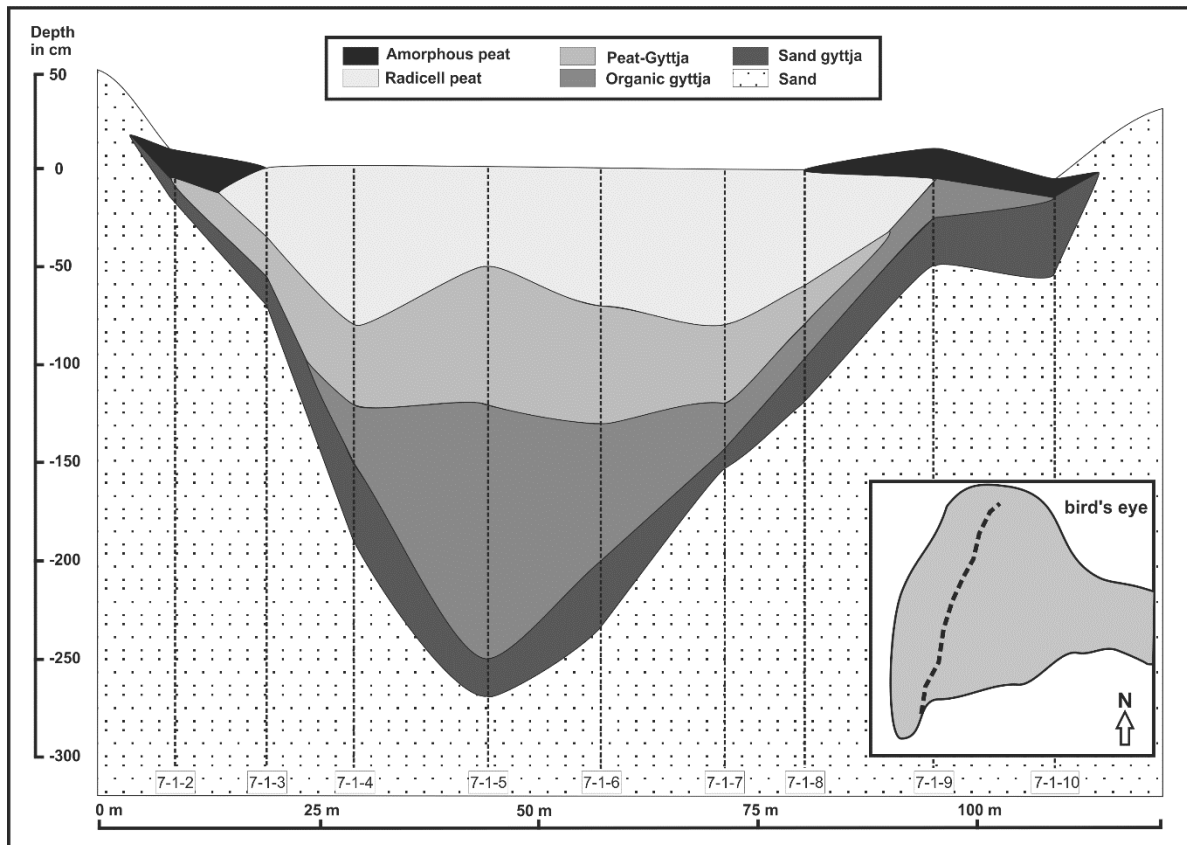

**Figure S4:** Cross-section of site ID 3 (transect 2)

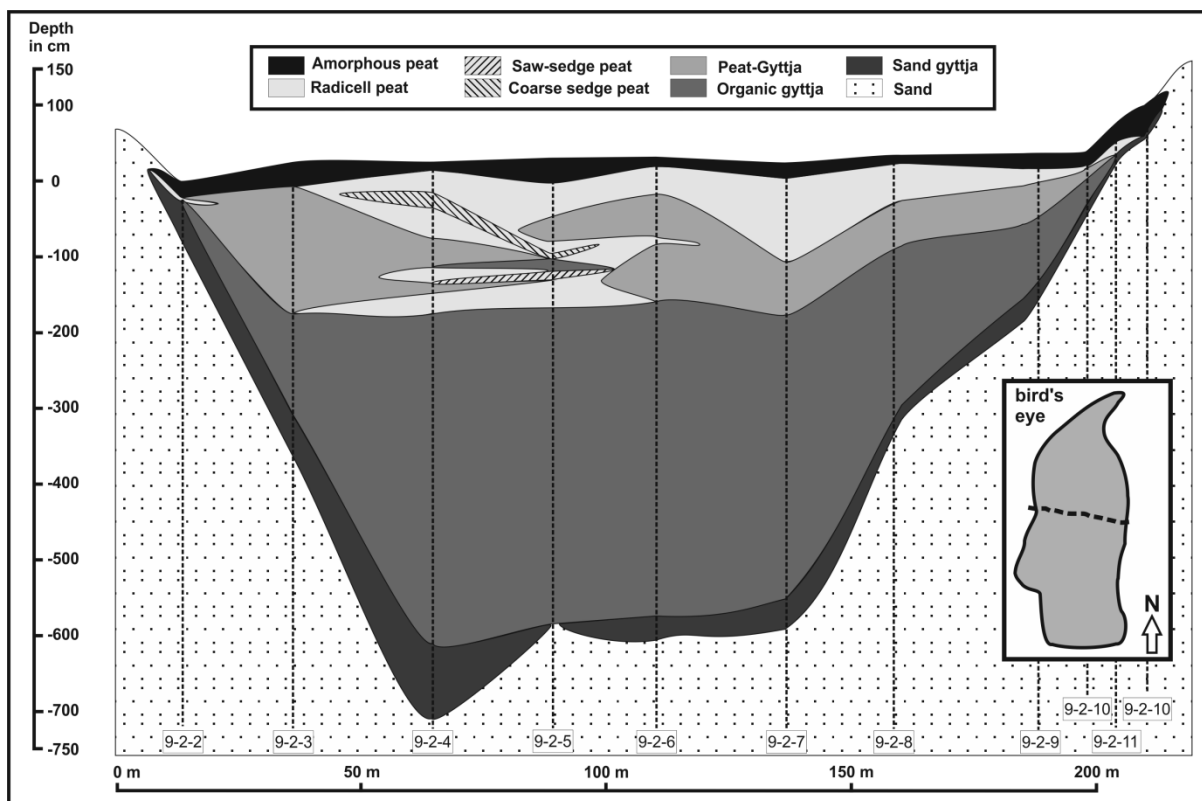

**Figure S5:** Cross-section of site SP (transect 3)

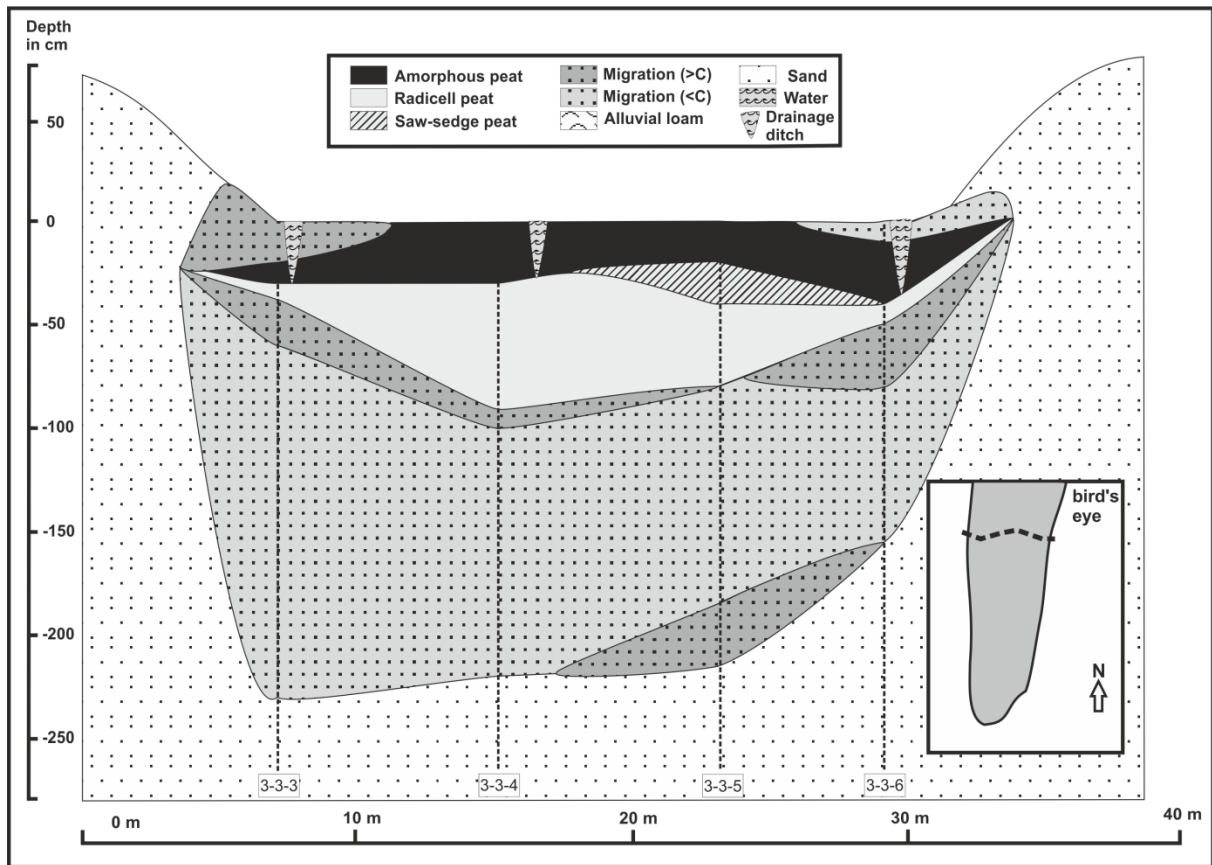

**Figure S6:** Cross-section of site UVB (transect 1).

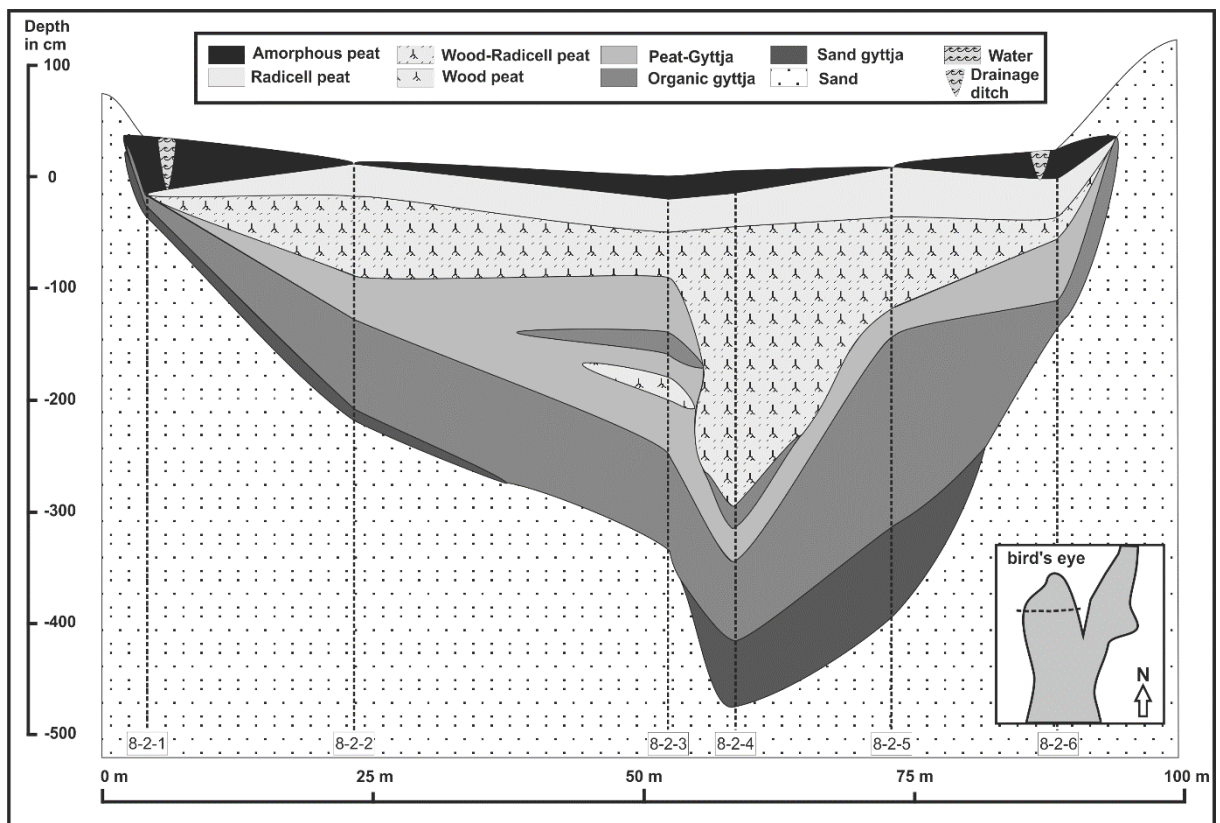

**Figure S7:** Cross-section of site UVB (transect 3)

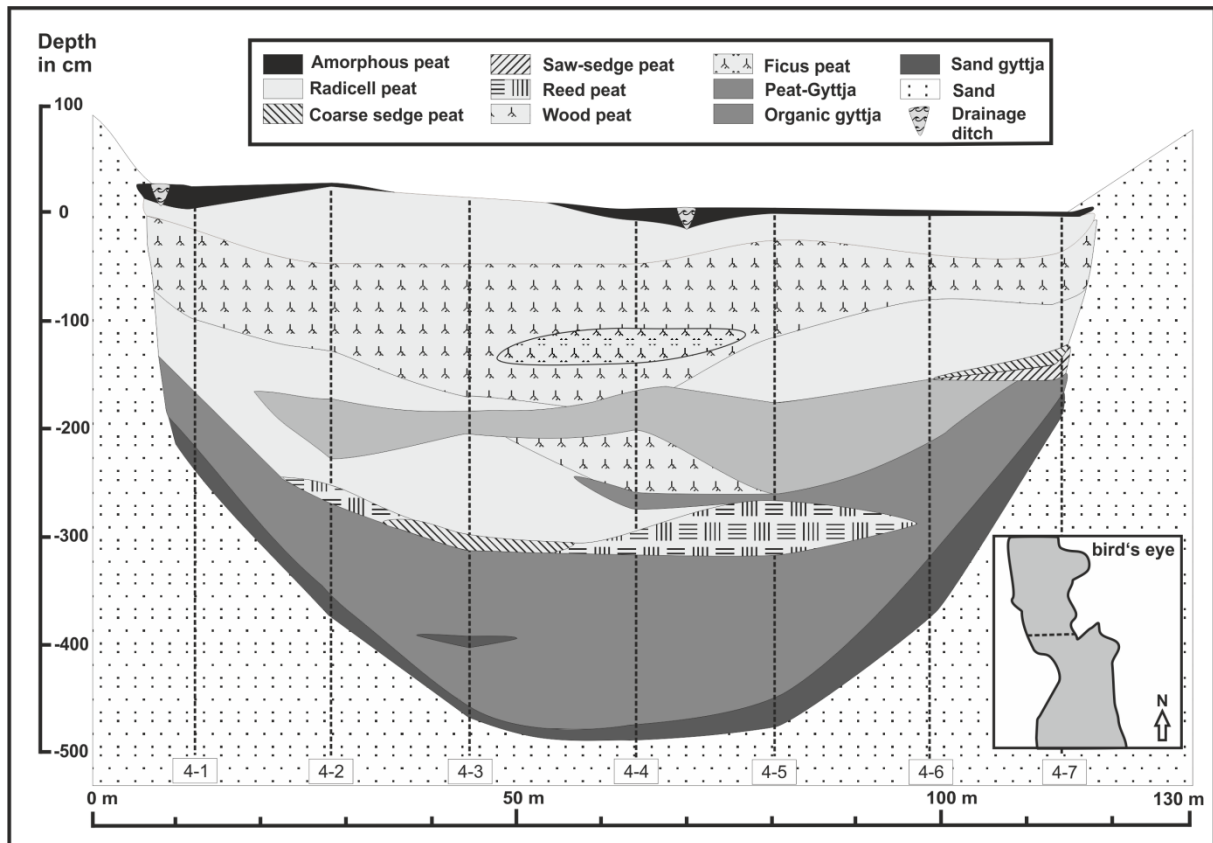

**Figure S8:** Cross-section of site UVB (transect 4)

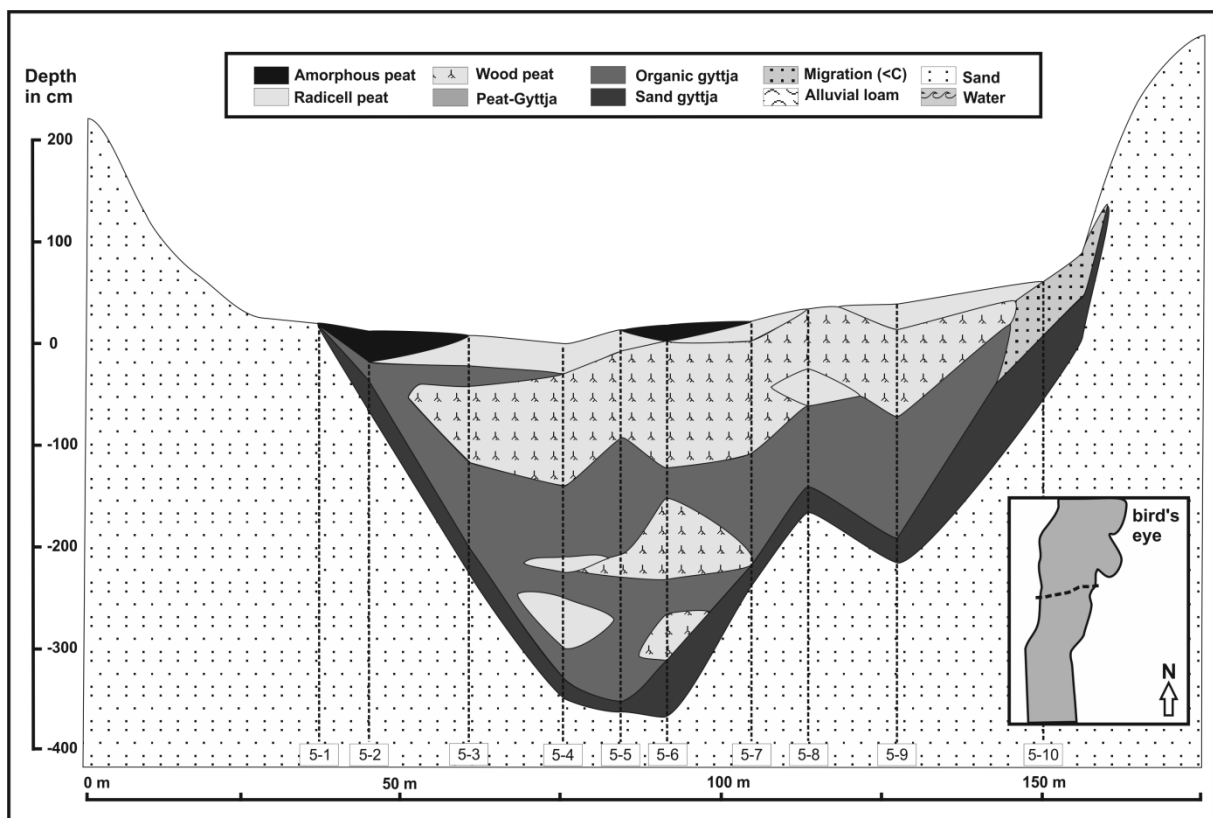

**Figure S9:** Soil profile and map of site FP. Likely raphia peat areas, derived from *Raphia australis* vegetation cover, identifiable in satellite image

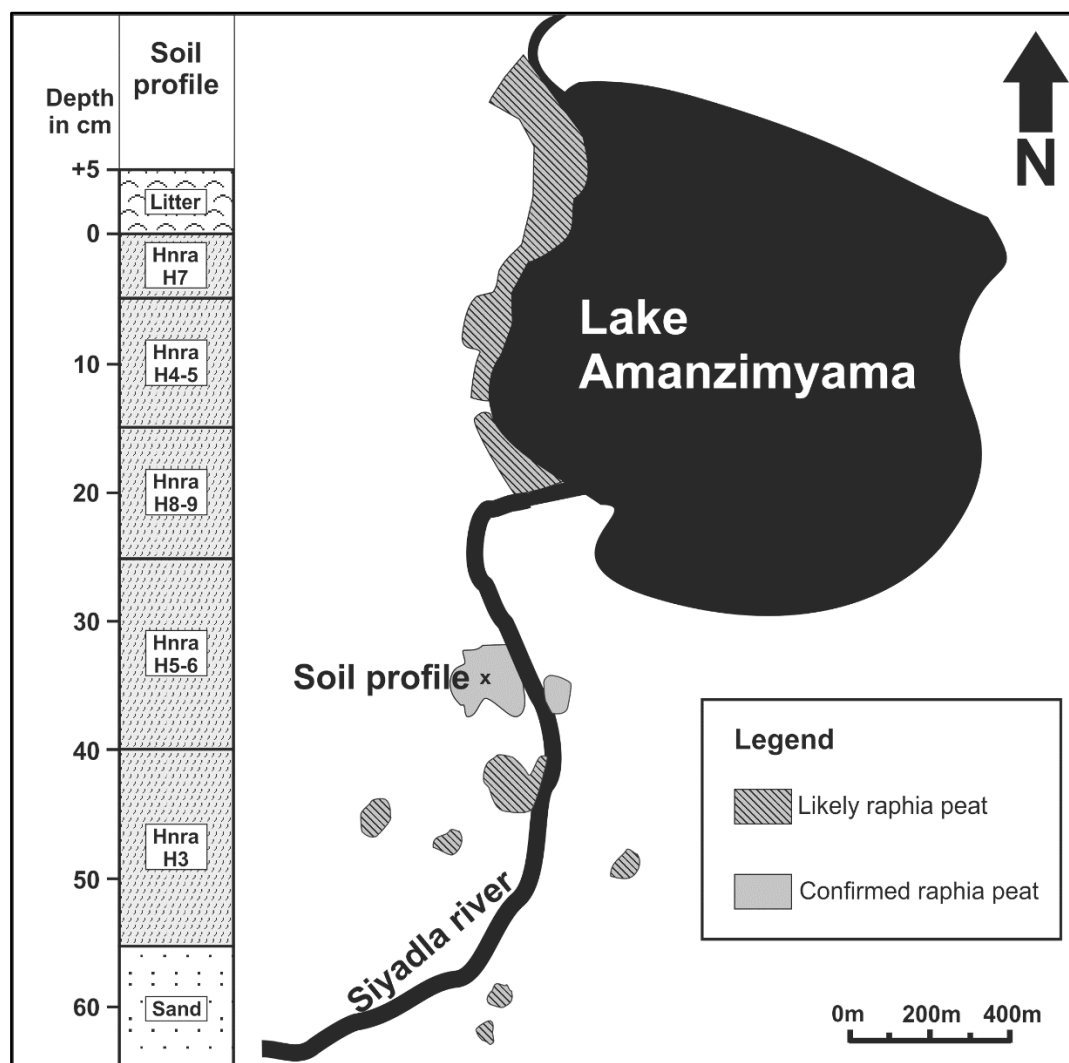

Supplement: Supplementary file 1 [file 2 › tjps_a_1360950_sm6017.pdf]
